# Supplementary material
Source: MDPI journal article supplement (https://www.mdpi.com/2227-9717/9/7/1254)
Supplement: s1 [file s1]

# **Approval Research for Carcinogen Humic-Like Substances (HULIS) Emitted from Residential Coal Combustion in High Lung Cancer Incidence Areas of China**

**Kai Xiao <sup>1</sup>, Qingyue Wang <sup>1,\*</sup>, Yichun Lin <sup>1</sup>, Weiqian Wang <sup>1</sup>, Senlin Lu <sup>2,\*</sup> and Shinich Yonemochi <sup>3</sup>**

<sup>1</sup> Graduate School of Science and Engineering, Saitama University, 255 Shimo-Okubo, Sakura-ku, Saitama City, Saitama 338-8570, Japan; xiao.k.662@ms.saitama-u.ac.jp (K.X.); lin.y.852@ms.saitama-u.ac.jp (Y.L.); weiqian@mail.saitama-u.ac.jp (W.W.)

<sup>2</sup> School of Environmental and Chemical Engineering, Shanghai University, 99 Shangdalu, Baoshan district, Shanghai 200444, China

<sup>3</sup> Center for Environmental Science in Saitama, 914 Kamitanadare, Kazo, Saitama 347-0115, Japan; yonemochi.shinichi@pref.saitama.lg.jp

\* Correspondence: seiyo@mail.saitama-u.ac.jp (Q.W.); senlinlv@staff.shu.edu.cn (S.L.)

**Figure S1.** The correlation coefficients between  $\text{NH}_4^+$  and  $\text{SO}_4^{2-}$ .

**Table S1.** The mass concentration of ion species ( $\mu\text{g m}^{-3}$ ) and percentage of SIA/WSIIs (%)

**Table S2.** Charge balance of ions

**Table S3.** Pearson correlation coefficients between HULIS-C and WSOC

**Table S4.** The P value of Pearson correlation coefficients between HULIS-C and WSOC and water-soluble ions in RCC particles

**Table S5.** Simulated combustion conditions

**Table S6.** Non-carcinogenic health risk of WSPTMs in RCC particles

**Table S7.** Carcinogenic health risk of WSPTMs in RCC particles

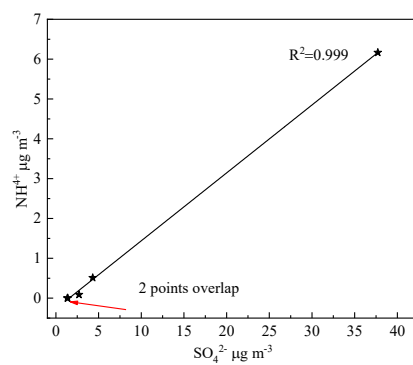

Figure S1. The correlation coefficients between  $\text{NH}_4^+$  and  $\text{SO}_4^{2-}$ .

**Table S1.** The mass concentration of ion species ( $\mu\text{g m}^{-3}$ ) and percentage of SIA/WSIIs (%)

| Sample  | Size (µm) | The mass concentration of ion species ( µg m <sup>-3</sup> ) and percentage of SIA/WSIIs (%) |                              |                              |                              |                               |                 |                              |                |                  |                  |        |           |
|---------|-----------|----------------------------------------------------------------------------------------------|------------------------------|------------------------------|------------------------------|-------------------------------|-----------------|------------------------------|----------------|------------------|------------------|--------|-----------|
|         |           | Cl <sup>-</sup>                                                                              | NO <sub>3</sub> <sup>-</sup> | NO <sub>2</sub> <sup>-</sup> | NO <sub>3</sub> <sup>-</sup> | SO <sub>4</sub> <sup>2-</sup> | Na <sup>+</sup> | NH <sub>4</sub> <sup>+</sup> | K <sup>+</sup> | Mg <sup>2+</sup> | Ca <sup>2+</sup> | Total  | SIA/WSIIs |
| BL      | <1.1      | 11.07                                                                                        | 3.65                         | 6.14                         | 29.16                        | 3.66                          | 0.00            | 1.20                         | 1.50           | 2.10             | 1.03             | 59.52  | 0.61      |
|         | 1.1-2.0   | 1.60                                                                                         | 1.40                         | 1.15                         | 5.94                         | 0.00                          | 1.03            | 1.03                         | 0.13           | 0.20             | 0.00             | 11.47  | 0.71      |
|         | 2.0-3.3   | 1.37                                                                                         | 0.56                         | 0.86                         | 4.83                         | 0.00                          | 0.53            | 0.53                         | 0.10           | 0.15             | 0.00             | 8.39   | 0.74      |
|         | 3.0-7.0   | 0.72                                                                                         | 0.42                         | 0.54                         | 1.68                         | 0.00                          | 0.00            | 0.00                         | 0.06           | 0.21             | 0.00             | 3.62   | 0.61      |
|         | >7.0      | 0.94                                                                                         | 0.06                         | 0.60                         | 1.87                         | 0.00                          | 0.00            | 0.00                         | 0.08           | 0.31             | 0.09             | 3.96   | 0.62      |
| LM      | <1.1      | 24.59                                                                                        | 3.50                         | 8.71                         | 32.62                        | 8.68                          | 0.00            | 0.00                         | 0.68           | 1.58             | 0.05             | 80.41  | 0.51      |
|         | 1.1-2.0   | 3.09                                                                                         | 0.37                         | 2.62                         | 3.45                         | 0.32                          | 0.00            | 0.00                         | 0.27           | 0.30             | 0.15             | 10.56  | 0.57      |
|         | 2.0-3.3   | 1.59                                                                                         | 0.43                         | 0.99                         | 2.25                         | 0.00                          | 0.00            | 0.00                         | 0.27           | 0.20             | 0.00             | 5.72   | 0.57      |
|         | 3.0-7.0   | 0.47                                                                                         | 0.36                         | 0.85                         | 1.09                         | 0.00                          | 0.00            | 0.00                         | 0.02           | 0.21             | 0.00             | 3.00   | 0.65      |
|         | >7.0      | 1.09                                                                                         | 0.07                         | 1.57                         | 1.58                         | 0.00                          | 0.00            | 0.00                         | 0.00           | 0.26             | 0.28             | 4.85   | 0.65      |
| SF      | <1.1      | 25.13                                                                                        | 2.17                         | 6.56                         | 61.07                        | 12.92                         | 0.00            | 11.38                        | 2.28           | 1.17             | 0.00             | 122.67 | 0.64      |
|         | 1.1-2.0   | 3.95                                                                                         | 0.33                         | 1.43                         | 5.54                         | 0.53                          | 0.84            | 0.84                         | 0.23           | 0.28             | 0.40             | 13.54  | 0.58      |
|         | 2.0-3.3   | 1.41                                                                                         | 0.42                         | 0.96                         | 2.91                         | 0.36                          | 0.00            | 0.00                         | 0.00           | 0.24             | 0.00             | 6.29   | 0.61      |
|         | 3.0-7.0   | 1.52                                                                                         | 0.25                         | 1.16                         | 2.56                         | 0.68                          | 0.00            | 0.00                         | 0.27           | 0.38             | 0.44             | 7.26   | 0.51      |
|         | >7.0      | 1.32                                                                                         | 0.22                         | 1.00                         | 1.88                         | 0.00                          | 0.00            | 0.00                         | 0.06           | 0.27             | 0.15             | 4.92   | 0.59      |
| LJW     | <1.1      | 11.43                                                                                        | 6.04                         | 5.44                         | 16.75                        | 0.00                          | 0.00            | 0.00                         | 0.52           | 1.41             | 0.00             | 41.58  | 0.53      |
|         | 1.1-2.0   | 1.59                                                                                         | 0.87                         | 0.92                         | 2.32                         | 0.77                          | 0.00            | 0.00                         | 0.17           | 0.20             | 0.00             | 6.84   | 0.47      |
|         | 2.0-3.3   | 2.12                                                                                         | 0.35                         | 0.84                         | 2.63                         | 0.80                          | 0.00            | 0.00                         | 0.19           | 0.42             | 0.65             | 8.01   | 0.43      |
|         | 3.0-7.0   | 0.67                                                                                         | 0.51                         | 0.47                         | 0.87                         | 0.00                          | 0.00            | 0.00                         | 0.20           | 0.17             | 0.00             | 2.89   | 0.46      |
|         | >7.0      | 0.69                                                                                         | 0.27                         | 0.46                         | 0.86                         | 0.00                          | 0.00            | 0.00                         | 0.07           | 0.25             | 0.49             | 3.10   | 0.43      |
| GM      | <1.1      | 3.91                                                                                         | 1.52                         | 3.65                         | 22.92                        | 0.00                          | 5.42            | 0.51                         | 0.66           | 0.73             | 0.00             | 38.81  | 0.69      |
|         | 1.1-2.0   | 1.34                                                                                         | 0.39                         | 0.87                         | 3.61                         | 0.00                          | 0.00            | 0.00                         | 0.24           | 0.30             | 0.03             | 7.29   | 0.69      |
|         | 2.0-3.3   | 0.56                                                                                         | 0.64                         | 0.57                         | 1.46                         | 0.00                          | 0.00            | 0.00                         | 0.21           | 0.22             | 0.00             | 3.65   | 0.56      |
|         | 3.0-7.0   | 0.39                                                                                         | 0.07                         | 0.44                         | 0.89                         | 0.00                          | 0.00            | 0.00                         | 0.09           | 0.15             | 0.00             | 2.03   | 0.65      |
|         | >7.0      | 1.15                                                                                         | 0.22                         | 0.69                         | 1.09                         | 0.28                          | 0.00            | 0.00                         | 0.30           | 0.20             | 0.00             | 3.92   | 0.45      |
| ZF      | <1.1      | 15.55                                                                                        | 2.52                         | 7.51                         | 63.76                        | 8.64                          | 19.00           | 2.56                         | 1.13           | 1.13             | 1.13             | 121.78 | 0.74      |
|         | 1.1-2.0   | 2.45                                                                                         | 1.50                         | 1.79                         | 5.02                         | 0.15                          | 0.69            | 0.69                         | 0.17           | 0.26             | 0.26             | 12.29  | 0.61      |
|         | 2.0-3.3   | 0.78                                                                                         | 0.33                         | 0.67                         | 2.18                         | 0.00                          | 0.00            | 0.00                         | 0.11           | 0.24             | 0.24             | 4.54   | 0.63      |
|         | 3.0-7.0   | 0.34                                                                                         | 0.30                         | 0.57                         | 0.93                         | 0.00                          | 0.00            | 0.00                         | 0.10           | 0.19             | 0.19             | 2.62   | 0.58      |
|         | >7.0      | 0.84                                                                                         | 0.70                         | 0.82                         | 1.04                         | 0.00                          | 0.00            | 0.00                         | 0.04           | 0.19             | 0.19             | 3.82   | 0.49      |
| AVERAGE |           |                                                                                              |                              |                              |                              |                               |                 |                              |                |                  |                  |        | 0.59      |
| SD      |           |                                                                                              |                              |                              |                              |                               |                 |                              |                |                  |                  |        | 0.09      |

**Table S2.** Charge balance of ions.

| Sample  | Size (μm) | cation | Anion | Anion/cation |
|---------|-----------|--------|-------|--------------|
| BL      | <1.1      | 0.49   | 1.11  | 2.25         |
|         | 1.1-2.0   | 0.08   | 0.22  | 2.83         |
|         | 2.0-3.3   | 0.04   | 0.17  | 3.74         |
|         | 3.0-7.0   | 0.02   | 0.07  | 3.80         |
|         | >7.0      | 0.03   | 0.08  | 2.36         |
| LM      | <1.1      | 0.53   | 1.60  | 3.02         |
|         | 1.1-2.0   | 0.05   | 0.21  | 3.99         |
|         | 2.0-3.3   | 0.02   | 0.12  | 5.05         |
|         | 3.0-7.0   | 0.02   | 0.06  | 3.26         |
|         | >7.0      | 0.04   | 0.09  | 2.58         |
| SF      | <1.1      | 1.35   | 2.14  | 1.59         |
|         | 1.1-2.0   | 0.12   | 0.26  | 2.17         |
|         | 2.0-3.3   | 0.04   | 0.13  | 3.57         |
|         | 3.0-7.0   | 0.09   | 0.12  | 1.35         |
|         | >7.0      | 0.03   | 0.10  | 3.10         |
| LJW     | <1.1      | 0.13   | 0.90  | 6.85         |
|         | 1.1-2.0   | 0.05   | 0.13  | 2.35         |
|         | 2.0-3.3   | 0.11   | 0.14  | 1.28         |
|         | 3.0-7.0   | 0.02   | 0.06  | 2.96         |
|         | >7.0      | 0.05   | 0.05  | 1.09         |
| GM      | <1.1      | 0.38   | 0.68  | 1.81         |
|         | 1.1-2.0   | 0.06   | 0.14  | 2.24         |
|         | 2.0-3.3   | 0.02   | 0.07  | 2.96         |
|         | 3.0-7.0   | 0.02   | 0.04  | 2.58         |
|         | >7.0      | 0.04   | 0.07  | 1.97         |
| ZF      | <1.1      | 1.65   | 1.95  | 1.18         |
|         | 1.1-2.0   | 0.08   | 0.24  | 2.82         |
|         | 2.0-3.3   | 0.03   | 0.09  | 2.48         |
|         | 3.0-7.0   | 0.03   | 0.05  | 1.66         |
|         | >7.0      | 0.03   | 0.07  | 2.79         |
| AVERAGE |           |        |       | 2.72         |
| SD      |           |        |       | 1.18         |

**Table S3.** Pearson correlation coefficients between HULIS-C and WSOC

| Samples | Size<br>( $\mu\text{m}$ ) | WSOC<br>( $\mu\text{g m}^{-3}$ ) | HULIS-C<br>( $\text{C } \mu\text{g m}^{-3}$ ) | Pearson correlation<br>coefficients |
|---------|---------------------------|----------------------------------|-----------------------------------------------|-------------------------------------|
| BL      | <1.1                      | 129.93                           | 92.02                                         | 0.99                                |
|         | 1.1-2.0                   | 76.47                            | 45.76                                         |                                     |
|         | 2.0-3.3                   | 81.08                            | 54.33                                         |                                     |
|         | 3.3-7.0                   | 27.44                            | 17.52                                         |                                     |
| LM      | <1.1                      | 224.58                           | 136.86                                        | 1.00                                |
|         | 1.1-2.0                   | 51.37                            | 31.77                                         |                                     |
|         | 2.0-3.3                   | 48.88                            | 26.50                                         |                                     |
|         | 3.3-7.0                   | 23.91                            | 17.52                                         |                                     |
| SF      | <1.1                      | 137.40                           | 90.78                                         | 0.98                                |
|         | 1.1-2.0                   | 78.04                            | 46.41                                         |                                     |
|         | 2.0-3.3                   | 67.17                            | 21.86                                         |                                     |
|         | 3.3-7.0                   | 68.24                            | 24.06                                         |                                     |
| LJW     | <1.1                      | 408.91                           | 123.02                                        | 0.99                                |
|         | 1.1-2.0                   | 122.76                           | 50.99                                         |                                     |
|         | 2.0-3.3                   | 70.75                            | 28.36                                         |                                     |
|         | 3.3-7.0                   | 61.18                            | 18.04                                         |                                     |
| GM      | <1.1                      | 31.96                            | 22.42                                         | 0.57                                |
|         | 1.1-2.0                   | 58.04                            | 16.34                                         |                                     |
|         | 2.0-3.3                   | 13.74                            | 14.58                                         |                                     |
|         | 3.3-7.0                   | 7.95                             | 3.27                                          |                                     |
| ZF      | <1.1                      | 68.07                            | 34.94                                         | 0.99                                |
|         | 1.1-2.0                   | 20.78                            | 14.58                                         |                                     |
|         | 2.0-3.3                   | 13.11                            | 9.01                                          |                                     |
|         | 3.3-7.0                   | 10.75                            | 6.34                                          |                                     |
|         |                           |                                  | Average                                       | 0.92                                |
|         |                           |                                  | TSD                                           | 0.16                                |

**Table S4.** The P value of Pearson correlation coefficients between HULIS-C and WSOC and water-soluble ions in RCC particles

| The P value |                 |                              |                |                  |                  |                 |                              |                              |                               |
|-------------|-----------------|------------------------------|----------------|------------------|------------------|-----------------|------------------------------|------------------------------|-------------------------------|
| HULIS-C     | Na <sup>+</sup> | NH <sub>4</sub> <sup>+</sup> | K <sup>+</sup> | Mg <sup>2+</sup> | Ca <sup>2+</sup> | Cl <sup>-</sup> | NO <sub>2</sub> <sup>-</sup> | NO <sub>3</sub> <sup>-</sup> | SO <sub>4</sub> <sup>2-</sup> |
| BL          | 0.021           | 0.020                        | 0.020          | 0.021            | 0.020            | 0.020           | 0.020                        | 0.019                        | 0.020                         |
| LM          | 0.070           | 0.061                        | 0.062          | 0.063            | 0.061            | 0.062           | 0.061                        | 0.061                        | 0.061                         |
| SF          | 0.018           | 0.017                        | 0.013          | 0.013            | 0.012            | 0.012           | 0.012                        | 0.014                        | 0.012                         |
| LJW         | 0.045           | 0.044                        | 0.045          | 0.046            | 0.045            | 0.046           | 0.045                        | 0.045                        | 0.045                         |
| GM          | 0.016           | 0.029                        | 0.017          | 0.017            | 0.015            | 0.017           | 0.016                        | 0.016                        | 0.016                         |
| ZF          | 0.048           | 0.136                        | 0.029          | 0.027            | 0.027            | 0.024           | 0.024                        | 0.024                        | 0.024                         |
| WSOC        | Na <sup>+</sup> | NH <sub>4</sub> <sup>+</sup> | K <sup>+</sup> | Mg <sup>2+</sup> | Ca <sup>2+</sup> | Cl <sup>-</sup> | NO <sub>2</sub> <sup>-</sup> | NO <sub>3</sub> <sup>-</sup> | SO <sub>4</sub> <sup>2-</sup> |
| BL          | 0.008           | 0.008                        | 0.008          | 0.008            | 0.008            | 0.008           | 0.008                        | 0.008                        | 0.008                         |
| LM          | 0.059           | 0.054                        | 0.055          | 0.055            | 0.054            | 0.055           | 0.054                        | 0.054                        | 0.054                         |
| SF          | 0.000           | 0.000                        | 0.000          | 0.000            | 0.000            | 0.000           | 0.000                        | 0.000                        | 0.000                         |
| LJW         | 0.067           | 0.067                        | 0.067          | 0.068            | 0.067            | 0.068           | 0.067                        | 0.067                        | 0.067                         |
| GM          | 0.024           | 0.030                        | 0.025          | 0.025            | 0.024            | 0.025           | 0.024                        | 0.024                        | 0.024                         |
| ZF          | 0.061           | 0.095                        | 0.050          | 0.048            | 0.048            | 0.046           | 0.046                        | 0.046                        | 0.046                         |

**Table S5.** Simulated combustion conditions

| Samples | Date      | period            | Volume<br>L/min | Pump,<br>Volume<br>m <sup>3</sup> /min | Temperature°C | Humidity% |
|---------|-----------|-------------------|-----------------|----------------------------------------|---------------|-----------|
| BL      | 2017.8.08 | 9: 52-<br>11:52   | 566             | 50                                     | 25.7          | 75        |
| LM      | 2017.8.15 | 10:10-12:<br>10   | 566             | 50                                     | 33            | 81        |
| SF      | 2017.8.16 | 16: 36-<br>18: 36 | 566             | 50                                     | 36            | 78        |
| LJW     | 2017.8.16 | 10:12-12:12       | 566             | 50                                     | 35            | 79        |
| GM      | 2017.8.20 | 14: 10-<br>16:10  | 566             | 50                                     | 28            | 81        |
| ZF      | 2017.8.20 | 16: 55-<br>18:55  | 566             | 50                                     | 38            | 80        |
| Average |           |                   |                 |                                        | 32.62         | 79.00     |
| SD      |           |                   |                 |                                        | 4.39          | 2.08      |

Table S6. Non-carcinogenic health risk of WSPTMs in RCC particles

| Table S6. Table Non-carcinogenic health risk of WSPTMs in RCC particles |         |          |          |          |          |          |          |          |          |          |          |          |          |          |          |          |          |          |  |
|-------------------------------------------------------------------------|---------|----------|----------|----------|----------|----------|----------|----------|----------|----------|----------|----------|----------|----------|----------|----------|----------|----------|--|
| Samples                                                                 | Size µm | V        |          | Cr(VI)   |          | Co       |          | As       |          | Cd       |          | Zn       |          | Mn       |          | Ba       |          | HI       |  |
|                                                                         |         | IEC      | HQ       |          |  |
| LM                                                                      | >7      | 8.74E-04 | 2.19E-03 | 2.62E-04 | 6.56E-04 | 7.58E-05 | 1.26E-02 | 2.20E-04 | 1.47E-02 | 2.36E-05 | 2.36E-03 | 1.12E-01 | 3.73E-05 | 4.92E-03 | 9.84E-03 | 4.88E-03 | 9.75E-02 | 1.40E-01 |  |
|                                                                         | 3.3-7.0 | 2.94E-04 | 7.34E-04 | 3.46E-04 | 8.64E-04 | 2.21E-05 | 3.69E-03 | 1.76E-04 | 1.17E-02 | 1.50E-05 | 1.50E-03 | 6.16E-02 | 2.05E-05 | 4.19E-03 | 8.38E-03 | 5.05E-03 | 1.01E-01 | 1.28E-01 |  |
|                                                                         | 2.0-3.3 | 9.26E-05 | 2.32E-04 | 2.79E-04 | 6.98E-04 | 9.52E-06 | 1.59E-03 | 2.68E-04 | 1.79E-02 |          |          | 5.31E-02 | 1.76E-05 | 5.23E-03 | 1.05E-02 | 1.44E-02 | 2.88E-01 | 3.19E-01 |  |
|                                                                         | 1.1-2.0 | 7.54E-05 | 1.89E-04 | 3.66E-04 | 9.14E-04 | 3.00E-05 | 5.00E-03 | 3.42E-04 | 2.28E-02 |          |          | 9.43E-02 | 3.13E-05 | 6.36E-03 | 1.27E-02 | 1.32E-02 | 2.64E-01 | 3.06E-01 |  |
|                                                                         | <1.1    | 1.99E-04 | 4.97E-04 | 9.65E-05 | 2.41E-04 | 2.93E-04 | 4.89E-02 | 3.93E-03 | 2.62E-01 | 3.87E-05 | 3.87E-03 | 7.48E-01 | 2.48E-04 | 2.14E-02 | 4.29E-02 | 4.33E-01 | 8.66E+00 | 9.02E+00 |  |
| BL                                                                      | >7      | 1.70E-04 | 4.24E-04 | 3.55E-04 | 8.86E-04 | 4.91E-05 | 8.19E-03 | 1.79E-04 | 1.19E-02 |          |          | 4.29E-02 | 1.43E-05 | 3.33E-03 | 6.66E-03 | 1.35E-02 | 2.69E-01 | 2.98E-01 |  |
|                                                                         | 3.3-7.0 | 8.45E-05 | 2.11E-04 | 5.53E-04 | 1.38E-03 | 4.00E-05 | 6.67E-03 | 2.54E-04 | 1.69E-02 |          |          | 4.31E-02 | 1.43E-05 | 1.98E-03 | 3.96E-03 | 1.31E-02 | 2.61E-01 | 2.90E-01 |  |
|                                                                         | 2.0-3.3 | 2.61E-05 | 6.51E-05 | 3.11E-04 | 7.77E-04 | 1.12E-04 | 1.86E-02 | 5.39E-04 | 3.59E-02 | 9.97E-05 | 9.97E-03 | 9.39E-02 | 3.12E-05 | 4.63E-03 | 9.26E-03 | 4.63E-03 | 9.26E-02 | 1.67E-01 |  |
|                                                                         | 1.1-2.0 | 2.74E-05 | 6.85E-05 | 3.56E-04 | 8.89E-04 | 1.12E-04 | 1.86E-02 | 6.30E-04 | 4.20E-02 | 1.30E-04 | 1.30E-02 | 1.06E-01 | 3.53E-05 | 1.48E-03 | 2.96E-03 | 4.28E-03 | 8.56E-02 | 1.63E-01 |  |
|                                                                         | <1.1    | 1.89E-04 | 4.72E-04 | 3.01E-04 | 7.51E-04 | 3.97E-04 | 6.62E-02 | 2.85E-03 | 1.90E-01 | 3.67E-04 | 3.67E-02 | 2.91E-01 | 9.68E-05 | 1.94E-02 | 3.89E-02 | 5.91E-02 | 1.18E+00 | 1.51E+00 |  |
| SF                                                                      | >7      | 1.16E-03 | 2.91E-03 | 2.32E-04 | 5.80E-04 | 6.97E-05 | 1.16E-02 | 1.58E-04 | 1.05E-02 |          |          | 1.06E-01 | 3.54E-05 | 2.49E-03 | 4.99E-03 | 5.20E-03 | 1.04E-01 | 1.35E-01 |  |
|                                                                         | 3.3-7.0 | 2.50E-04 | 6.26E-04 | 1.15E-04 | 2.88E-04 | 3.67E-05 | 6.11E-03 | 2.27E-04 | 1.51E-02 | 1.50E-05 | 1.50E-03 | 3.87E-02 | 1.29E-05 | 3.15E-03 | 6.29E-03 | 1.53E-03 | 3.06E-02 | 6.05E-02 |  |
|                                                                         | 2.0-3.3 | 8.74E-05 | 2.19E-04 | 1.85E-04 | 4.61E-04 | 1.20E-05 | 2.00E-03 | 1.55E-04 | 1.03E-02 |          |          | 7.12E-02 | 2.37E-05 | 4.83E-03 | 9.65E-03 | 1.15E-02 | 2.29E-01 | 2.52E-01 |  |
|                                                                         | 1.1-2.0 | 2.91E-05 | 7.28E-05 | 7.60E-05 | 1.90E-04 | 9.09E-06 | 1.51E-03 | 1.83E-04 | 1.22E-02 | 2.67E-05 | 2.67E-03 | 8.68E-02 | 2.89E-05 | 6.81E-03 | 1.36E-02 | 1.34E-02 | 2.67E-01 | 2.98E-01 |  |
|                                                                         | <1.1    | 1.85E-04 | 4.64E-04 | 2.63E-04 | 6.57E-04 | 7.55E-05 | 1.26E-02 | 1.14E-03 | 7.60E-02 | 3.86E-05 | 3.86E-03 | 9.13E-01 | 3.03E-04 | 1.32E-02 | 2.64E-02 | 2.97E-01 | 5.94E+00 | 6.06E+00 |  |
| LJW                                                                     | >7      | 2.48E-04 | 6.19E-04 | 2.29E-04 | 5.73E-04 | 3.04E-05 | 5.07E-03 | 1.61E-04 | 1.08E-02 |          |          | 6.16E-02 | 2.05E-05 | 3.39E-03 | 6.78E-03 | 1.67E-02 | 3.33E-01 | 3.57E-01 |  |
|                                                                         | 3.3-7.0 | 9.25E-05 | 2.31E-04 | 4.63E-04 | 1.16E-03 | 3.33E-06 | 5.55E-04 | 1.39E-04 | 9.26E-03 |          |          | 5.88E-02 | 1.95E-05 | 9.84E-04 | 1.97E-03 | 4.10E-03 | 8.20E-02 | 9.52E-02 |  |
|                                                                         | 2.0-3.3 | 6.89E-05 | 1.72E-04 | 2.42E-04 | 6.05E-04 | 9.83E-06 | 1.64E-03 | 1.58E-04 | 1.05E-02 |          |          | 5.38E-02 | 1.79E-05 | 1.41E-03 | 2.82E-03 | 1.35E-03 | 2.71E-02 | 4.29E-02 |  |
|                                                                         | 1.1-2.0 | 1.71E-06 | 4.28E-06 | 1.98E-04 | 4.96E-04 | 1.67E-05 | 2.78E-03 | 1.46E-04 | 9.71E-03 |          |          | 7.43E-02 | 2.47E-05 | 5.53E-03 | 1.11E-02 | 5.92E-03 | 1.18E-01 | 1.42E-01 |  |
|                                                                         | <1.1    | 1.62E-04 | 4.06E-04 | 1.16E-04 | 2.91E-04 | 9.13E-05 | 1.52E-02 | 2.14E-03 | 1.43E-01 | 6.76E-05 | 6.76E-03 | 3.93E-01 | 1.31E-04 | 6.79E-03 | 1.36E-02 | 6.02E-03 | 1.20E-01 | 3.00E-01 |  |
| GM                                                                      | >7      | 2.73E-04 | 6.82E-04 | 1.82E-04 | 4.55E-04 | 6.02E-05 | 1.00E-02 | 1.44E-04 | 9.62E-03 |          |          | 4.37E-02 | 1.45E-05 | 5.53E-03 | 1.11E-02 | 1.07E-02 | 2.13E-01 | 2.45E-01 |  |
|                                                                         | 3.3-7.0 | 1.38E-04 | 3.46E-04 | 1.86E-04 | 4.65E-04 | 4.51E-05 | 7.52E-03 | 9.83E-05 | 6.55E-03 |          |          | 4.25E-02 | 1.41E-05 | 2.62E-03 | 5.23E-03 | 8.66E-03 | 1.73E-01 | 1.93E-01 |  |
|                                                                         | 2.0-3.3 | 1.11E-04 | 2.78E-04 | 1.27E-04 | 3.17E-04 | 7.68E-06 | 1.28E-03 | 1.10E-04 | 7.33E-03 |          |          | 4.26E-02 | 1.42E-05 | 1.00E-03 | 2.00E-03 | 8.91E-03 | 1.78E-01 | 1.89E-01 |  |
|                                                                         | 1.1-2.0 | 1.26E-04 | 3.14E-04 | 2.25E-04 | 5.64E-04 | 5.88E-05 | 9.80E-03 | 3.29E-04 | 2.19E-02 |          |          | 7.98E-02 | 2.65E-05 | 3.60E-03 | 7.21E-03 | 2.25E-03 | 4.51E-02 | 8.49E-02 |  |
|                                                                         | <1.1    | 6.59E-04 | 1.65E-03 | 3.05E-04 | 7.63E-04 | 2.48E-04 | 4.13E-02 | 1.47E-03 | 9.82E-02 | 5.02E-04 | 5.02E-02 | 3.23E-01 | 1.07E-04 | 3.20E-02 | 6.39E-02 | 1.18E-01 | 2.35E+00 | 2.61E+00 |  |
| ZF                                                                      | >7      | 2.00E-04 | 5.01E-04 | 2.41E-04 | 6.02E-04 | 7.68E-06 | 1.28E-03 | 2.09E-04 | 1.40E-02 |          |          | 4.28E-02 | 1.42E-05 | 1.72E-03 | 3.44E-03 | 2.37E-03 | 4.74E-02 | 6.72E-02 |  |
|                                                                         | 3.3-7.0 | 1.09E-04 | 2.71E-04 | 3.08E-04 | 7.70E-04 | 2.61E-05 | 4.34E-03 | 1.97E-04 | 1.31E-02 |          |          | 4.93E-02 | 1.64E-05 | 1.48E-03 | 2.97E-03 | 1.92E-03 | 3.83E-02 | 5.98E-02 |  |
|                                                                         | 2.0-3.3 | 4.57E-05 | 1.14E-04 | 2.60E-04 | 6.50E-04 |          |          | 2.40E-04 | 1.60E-02 |          |          | 2.20E-02 | 7.29E-06 | 1.73E-03 | 3.47E-03 | 1.92E-03 | 3.83E-02 | 5.86E-02 |  |
|                                                                         | 1.1-2.0 | 6.23E-05 | 1.56E-04 | 1.47E-04 | 3.68E-04 | 7.88E-06 | 1.31E-03 | 5.73E-04 | 3.82E-02 | 3.38E-04 | 3.38E-02 | 4.71E-02 | 1.56E-05 | 3.80E-03 | 7.59E-03 | 3.97E-03 | 7.95E-02 | 1.61E-01 |  |
|                                                                         | <1.1    | 5.43E-04 | 1.36E-03 | 2.08E-04 | 5.19E-04 | 3.69E-05 | 6.15E-03 | 3.69E-03 | 2.46E-01 | 2.30E-03 | 2.30E-01 | 1.87E-01 | 6.22E-05 | 1.62E-02 | 3.25E-02 | 1.11E-02 | 2.22E-01 | 7.39E-01 |  |

Table S7. Carcinogenic health risk of WSPTMs in RCC particles

| Table S7. Carcinogenic health risk of WSPTMs in RCC particles |           |          |          |          |          |          |          |          |          |          |          |          |          |          |          |
|---------------------------------------------------------------|-----------|----------|----------|----------|----------|----------|----------|----------|----------|----------|----------|----------|----------|----------|----------|
| Sample                                                        | Size (µm) | V        |          | Cr(VI)   |          | Co       |          | As       |          | Cd       |          | Pb       |          | TCR      |          |
|                                                               |           | Child    | Adult    |
| LM                                                            | >7        | 6.74E-07 | 2.70E-06 | 2.92E-07 | 1.17E-06 | 6.34E-08 | 2.54E-08 | 8.77E-08 | 3.51E-07 | 3.95E-09 | 1.58E-08 | 1.51E-10 | 6.04E-10 | 1.12E-06 | 4.26E-06 |
|                                                               | 3.3-7.0   | 2.26E-07 | 9.05E-07 | 3.85E-07 | 1.54E-06 | 1.85E-08 | 7.39E-09 | 7.03E-08 | 2.81E-07 | 2.51E-09 | 1.00E-08 | 1.41E-10 | 5.64E-10 | 7.03E-07 | 2.75E-06 |
|                                                               | 2.0-3.3   | 7.14E-08 | 2.86E-07 | 3.11E-07 | 1.24E-06 | 7.95E-09 | 3.18E-09 | 1.07E-07 | 4.28E-07 |          |          | 1.14E-10 | 4.54E-10 | 4.98E-07 | 1.96E-06 |
|                                                               | 1.1-2.0   | 5.81E-08 | 2.32E-07 | 4.07E-07 | 1.63E-06 | 2.51E-08 | 1.00E-08 | 1.37E-07 | 5.46E-07 |          |          | 1.36E-10 | 5.44E-10 | 6.27E-07 | 2.42E-06 |
|                                                               | <1.1      | 1.53E-07 | 6.12E-07 | 1.08E-07 | 4.30E-07 | 2.45E-07 | 9.80E-08 | 1.57E-06 | 6.27E-06 | 6.46E-09 | 2.58E-08 | 3.07E-09 | 1.23E-08 | 2.08E-06 | 7.45E-06 |
| BL                                                            | TSP       | 1.18E-06 | 4.73E-06 | 1.50E-06 | 6.01E-06 | 3.60E-07 | 1.44E-07 | 1.97E-06 | 7.88E-06 | 1.29E-08 | 5.17E-08 | 3.61E-09 | 1.44E-08 | 5.03E-06 | 1.88E-05 |
|                                                               | >7        | 1.31E-07 | 5.23E-07 | 3.95E-07 | 1.58E-06 | 4.11E-08 | 1.64E-08 | 7.13E-08 | 2.85E-07 |          |          | 3.95E-11 | 1.58E-10 | 6.38E-07 | 2.40E-06 |
|                                                               | 3.3-7.0   | 6.51E-08 | 2.61E-07 | 6.16E-07 | 2.46E-06 | 3.34E-08 | 1.34E-08 | 1.01E-07 | 4.06E-07 |          |          | 5.74E-11 | 2.30E-10 | 8.16E-07 | 3.14E-06 |
|                                                               | 2.0-3.3   | 2.01E-08 | 8.03E-08 | 3.46E-07 | 1.39E-06 | 9.34E-08 | 3.74E-08 | 2.15E-07 | 8.61E-07 | 1.67E-08 | 6.66E-08 | 1.54E-10 | 6.16E-10 | 6.92E-07 | 2.43E-06 |
|                                                               | 1.1-2.0   | 2.11E-08 | 8.45E-08 | 3.96E-07 | 1.58E-06 | 9.34E-08 | 3.74E-08 | 2.52E-07 | 1.01E-06 | 2.17E-08 | 8.69E-08 | 1.26E-10 | 5.02E-10 | 7.84E-07 | 2.80E-06 |
| SF                                                            | <1.1      | 1.45E-07 | 5.82E-07 | 3.35E-07 | 1.34E-06 | 3.32E-07 | 1.33E-07 | 1.14E-06 | 4.55E-06 | 6.14E-08 | 2.45E-07 | 4.39E-10 | 1.76E-09 | 2.01E-06 | 6.85E-06 |
|                                                               | TSP       | 3.83E-07 | 1.53E-06 | 2.09E-06 | 8.35E-06 | 5.93E-07 | 2.37E-07 | 1.78E-06 | 7.11E-06 | 9.97E-08 | 3.99E-07 | 8.15E-10 | 3.26E-09 | 4.94E-06 | 1.76E-05 |
|                                                               | >7        | 8.96E-07 | 3.58E-06 | 2.58E-07 | 1.03E-06 | 5.82E-08 | 2.33E-08 | 6.31E-08 | 2.52E-07 |          |          | 4.41E-12 | 1.76E-11 | 1.28E-06 | 4.89E-06 |
|                                                               | 3.3-7.0   | 1.93E-07 | 7.71E-07 | 1.28E-07 | 5.14E-07 | 3.06E-08 | 1.23E-08 | 9.06E-08 | 3.63E-07 | 2.51E-09 | 1.00E-08 |          |          | 4.45E-07 | 1.67E-06 |
|                                                               | 2.0-3.3   | 6.74E-08 | 2.69E-07 | 2.06E-07 | 8.23E-07 | 1.00E-08 | 4.00E-09 | 6.17E-08 | 2.47E-07 |          |          |          |          | 3.45E-07 | 1.34E-06 |
| LJW                                                           | 1.1-2.0   | 2.24E-08 | 8.98E-08 | 8.47E-08 | 3.39E-07 | 7.59E-09 | 3.04E-09 | 7.30E-08 | 2.92E-07 | 4.46E-09 | 1.78E-08 | 3.07E-10 | 1.23E-09 | 1.93E-07 | 7.43E-07 |
|                                                               | <1.1      | 1.43E-07 | 5.72E-07 | 2.93E-07 | 1.17E-06 | 6.31E-08 | 2.52E-08 | 4.55E-07 | 1.82E-06 | 6.46E-09 | 2.58E-08 | 5.55E-10 | 2.22E-09 | 9.61E-07 | 3.62E-06 |
|                                                               | TSP       | 1.32E-06 | 5.28E-06 | 9.70E-07 | 3.88E-06 | 1.70E-07 | 6.78E-08 | 7.43E-07 | 2.97E-06 | 1.34E-08 | 5.37E-08 | 8.66E-10 | 3.46E-09 | 3.22E-06 | 1.23E-05 |
|                                                               | >7        | 1.91E-07 | 7.64E-07 | 2.56E-07 | 1.02E-06 | 2.54E-08 | 1.02E-08 | 6.44E-08 | 2.58E-07 |          |          |          |          | 5.36E-07 | 2.05E-06 |
|                                                               | 3.3-7.0   | 7.13E-08 | 2.85E-07 | 5.16E-07 | 2.06E-06 | 2.78E-09 | 1.11E-09 | 5.55E-08 | 2.22E-07 |          |          |          |          | 6.45E-07 | 2.57E-06 |
| GM                                                            | 2.0-3.3   | 5.31E-08 | 2.12E-07 | 2.70E-07 | 1.08E-06 | 8.21E-09 | 3.28E-09 | 6.31E-08 | 2.52E-07 |          |          |          |          | 3.94E-07 | 1.55E-06 |
|                                                               | 1.1-2.0   | 1.32E-09 | 5.28E-09 | 2.21E-07 | 8.84E-07 | 1.39E-08 | 5.57E-09 | 5.82E-08 | 2.33E-07 |          |          |          |          | 2.94E-07 | 1.13E-06 |
|                                                               | <1.1      | 1.25E-07 | 5.00E-07 | 1.30E-07 | 5.19E-07 | 7.63E-08 | 3.05E-08 | 8.55E-07 | 3.42E-06 | 1.13E-08 | 4.52E-08 | 1.73E-10 | 6.91E-10 | 1.20E-06 | 4.51E-06 |
|                                                               | TSP       | 4.42E-07 | 1.77E-06 | 1.39E-06 | 5.57E-06 | 1.27E-07 | 5.07E-08 | 1.10E-06 | 4.38E-06 | 1.13E-08 | 4.52E-08 | 1.73E-10 | 6.91E-10 | 3.07E-06 | 1.18E-05 |
|                                                               | >7        | 2.10E-07 | 8.41E-07 | 2.03E-07 | 8.11E-07 | 5.03E-08 | 2.01E-08 | 5.76E-08 | 2.30E-07 |          |          |          |          | 5.21E-07 | 1.90E-06 |
| ZF                                                            | 3.3-7.0   | 1.07E-07 | 4.26E-07 | 2.07E-07 | 8.30E-07 | 3.77E-08 | 1.51E-08 | 3.92E-08 | 1.57E-07 |          |          |          |          | 3.91E-07 | 1.43E-06 |
|                                                               | 2.0-3.3   | 8.57E-08 | 3.43E-07 | 1.41E-07 | 5.64E-07 | 6.41E-09 | 2.57E-09 | 4.39E-08 | 1.75E-07 |          |          |          |          | 2.77E-07 | 1.08E-06 |
|                                                               | 1.1-2.0   | 9.68E-08 | 3.87E-07 | 2.51E-07 | 1.00E-06 | 4.91E-08 | 1.96E-08 | 1.31E-07 | 5.25E-07 |          |          | 4.87E-11 | 1.95E-10 | 5.28E-07 | 1.94E-06 |
|                                                               | <1.1      | 5.08E-07 | 2.03E-06 | 3.40E-07 | 1.36E-06 | 2.07E-07 | 8.28E-08 | 5.88E-07 | 2.35E-06 | 8.40E-08 | 3.36E-07 | 0.00E+00 | 0.00E+00 | 1.73E-06 | 6.16E-06 |
|                                                               | TSP       | 1.01E-06 | 4.03E-06 | 1.14E-06 | 4.57E-06 | 3.50E-07 | 1.40E-07 | 8.60E-07 | 3.44E-06 | 8.40E-08 | 3.36E-07 | 4.87E-11 | 1.95E-10 | 3.44E-06 | 1.25E-05 |
| ZF                                                            | >7        | 1.54E-07 | 6.17E-07 | 2.68E-07 | 1.07E-06 | 6.41E-09 | 2.57E-09 | 8.36E-08 | 3.35E-07 |          |          |          |          | 5.13E-07 | 2.03E-06 |
|                                                               | 3.3-7.0   | 8.36E-08 | 3.35E-07 | 3.43E-07 | 1.37E-06 | 2.18E-08 | 8.71E-09 | 7.85E-08 | 3.14E-07 |          |          |          |          | 5.27E-07 | 2.03E-06 |
|                                                               | 2.0-3.3   | 3.52E-08 | 1.41E-07 | 2.90E-07 | 1.16E-06 |          |          | 9.60E-08 | 3.84E-07 |          |          |          |          | 4.21E-07 | 1.68E-06 |
|                                                               | 1.1-2.0   | 4.80E-08 | 1.92E-07 | 1.64E-07 | 6.55E-07 | 6.58E-09 | 2.63E-09 | 2.29E-07 | 9.14E-07 | 5.65E-08 | 2.26E-07 | 1.27E-09 | 5.07E-09 | 5.05E-07 | 2.00E-06 |
|                                                               | <1.1      | 4.19E-07 | 1.67E-06 | 2.31E-07 | 9.25E-07 | 3.08E-08 | 1.23E-08 | 1.47E-06 | 5.90E-06 | 3.84E-07 | 1.54E-06 | 2.41E-08 | 9.65E-08 | 2.56E-06 | 1.01E-05 |
|                                                               | TSP       | 7.40E-07 | 2.96E-06 | 1.30E-06 | 5.19E-06 | 6.56E-08 | 2.62E-08 | 1.96E-06 | 7.84E-06 | 4.41E-07 | 1.76E-06 | 2.54E-08 | 1.02E-07 | 4.53E-06 | 1.79E-05 |
